# Supplementary material
Source: PubMed Central journal article supplement (PMC6682057)
Supplement: ao9b01039_si_002.pdf [file ao9b01039_si_002.pdf]

# Melanin: A Greener Route to Enhance Energy Storage under Solar Light

*Ri Xu<sup>a\*</sup>, Abdelaziz Gouda<sup>a\*</sup>, Maria Federica Caso<sup>b</sup>, Francesca Soavi<sup>c\*\*</sup> and Clara Santato<sup>a\*\*</sup>*

<sup>a</sup>Department of Engineering Physics, Polytechnique Montréal, C.P. 6079, Succ. Centre-ville, Montréal, QC, H3C 3A7, Canada

<sup>b</sup> Nanofaber Spin-Off at ENEA, Casaccia Research Centre, Via Anguillarese 301, Roma, 00123, Italy

<sup>c</sup>Dipartimento di Chimica “Giacomo Ciamician”, Alma Mater Studiorum Università di Bologna, Via Selmi, 2, 40126 Bologna, Italy

\* Authors contributed equally to this work.

\*\*Correspondence and requests for materials should be addressed to C.S. and F.S. (e-mail: [clara.santato@polymtl.ca](mailto:clara.santato@polymtl.ca) and [francesca.soavi@unibo.it](mailto:francesca.soavi@unibo.it))

### Cyclic voltammetry on carbon paper

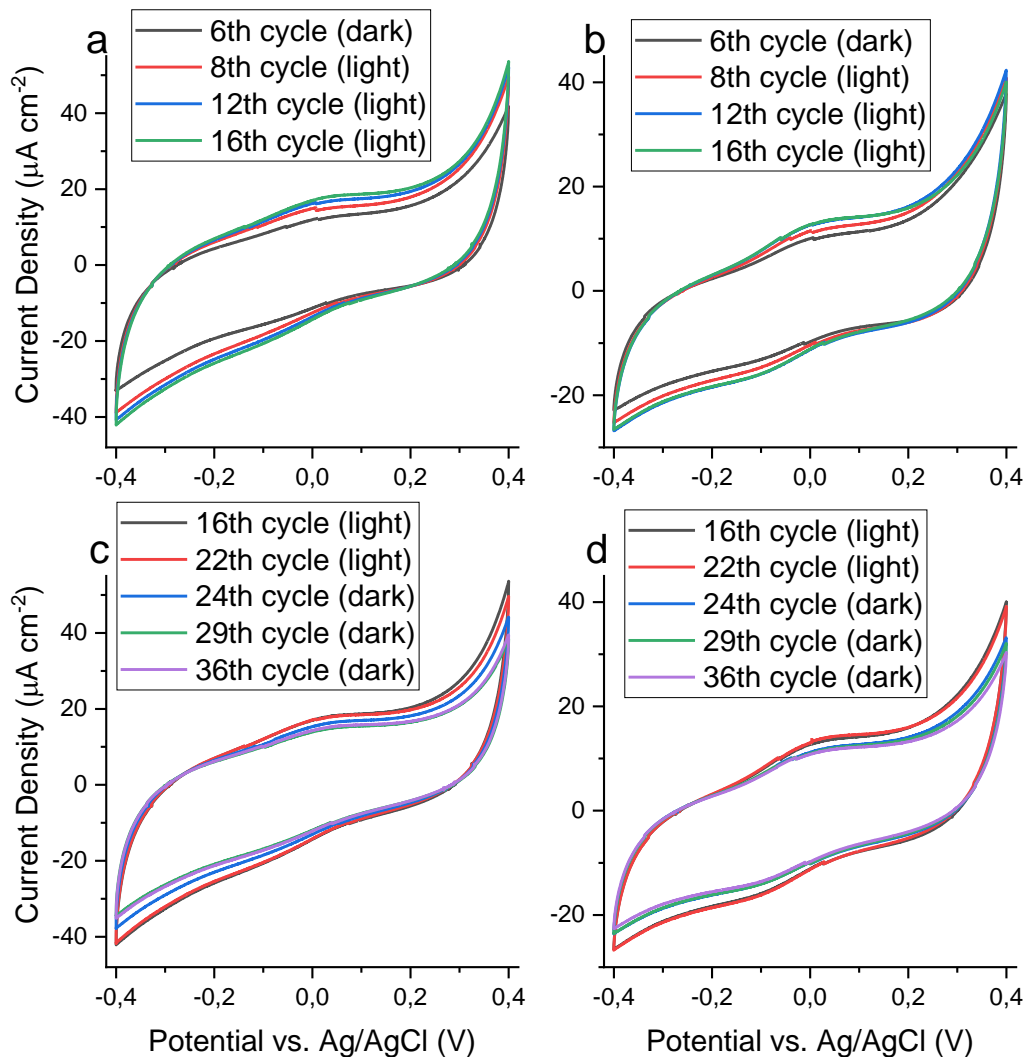

Figure S1. Cyclic voltammetry of (a, c) DHI-melanin and (b, d) DHI/DHICA-melanin on carbon paper electrodes (loading  $0.1 \text{ mg/cm}^2$ ) at  $5 \text{ mV/s}$ . Protocol of acquisition: dark (6 cycles)  $\rightarrow$  light (16 cycles)  $\rightarrow$  dark (14 cycles).

Under light irradiation, the current for both melanins slightly increases. Table S2 includes the values of the capacity and capacitance, for dark and light conditions, for increasing cycle numbers.

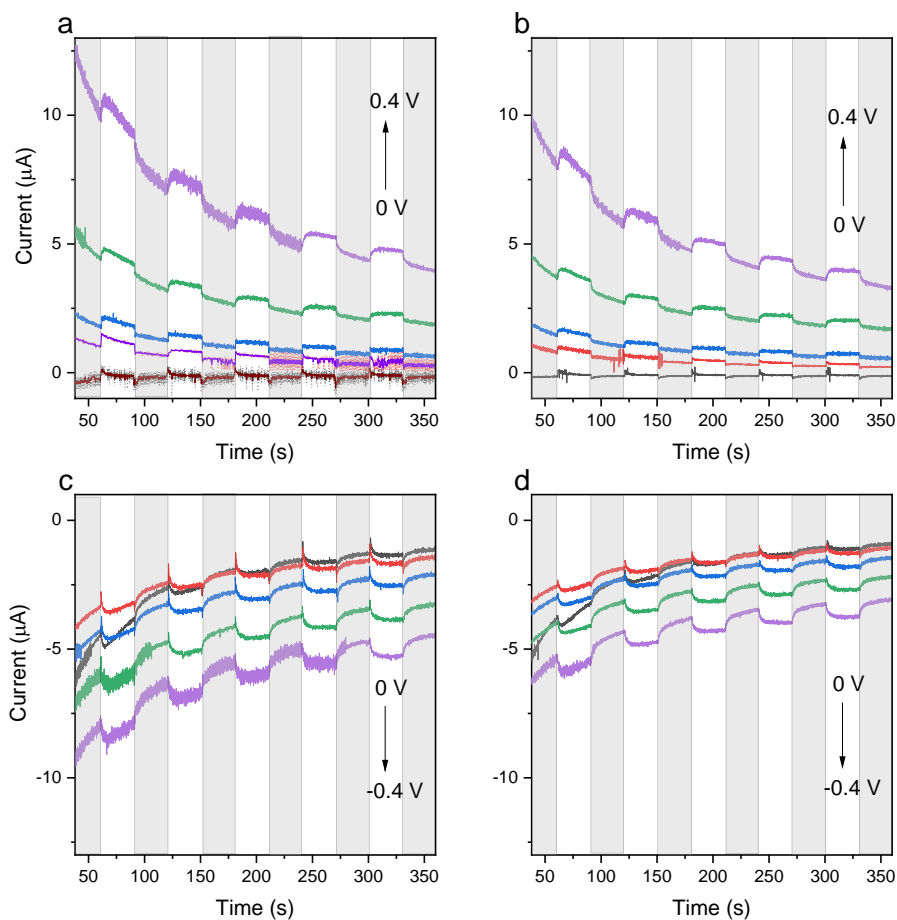

Figure S2. Current measurements with chopped light for (a) (c) DHI-melanin and (b) (d) DHI/DHICA-melanin. Gray rectangles represent the lapse of time spent by the samples in the dark. Acquisition protocol:  $0\text{ V} \rightarrow 0.1\text{ V} \rightarrow 0.2\text{ V} \rightarrow 0.3\text{ V} \rightarrow 0.4\text{ V} \rightarrow 0\text{ V} \rightarrow -0.1\text{ V} \rightarrow -0.2\text{ V} \rightarrow -0.3\text{ V} \rightarrow -0.4\text{ V}$  vs Ag/AgCl. Prior the current measurements, fresh electrodes were pre-cycled in the potential range  $-0.4\text{ V}/0.4\text{ V}$ , at  $5\text{ mV/s}$ , for 5 cycles. Current measurements carried out on DHI- and DHI/DHICA-melanins indicate an increase of the current under light conditions, for both anodic and cathodic applied potentials.

Considering the more significant effect of the light on the current when a positive potential is applied to the photoelectrode, a positive potential has been used throughout this work to study the effect of the light on the electrochemical energy storage performance of melanin electrodes. Work is in progress to study, by time resolved spectroscopy and DFT calculations, the reasons why the positive potential induces a superior effect on the current with respect to the negative potential.

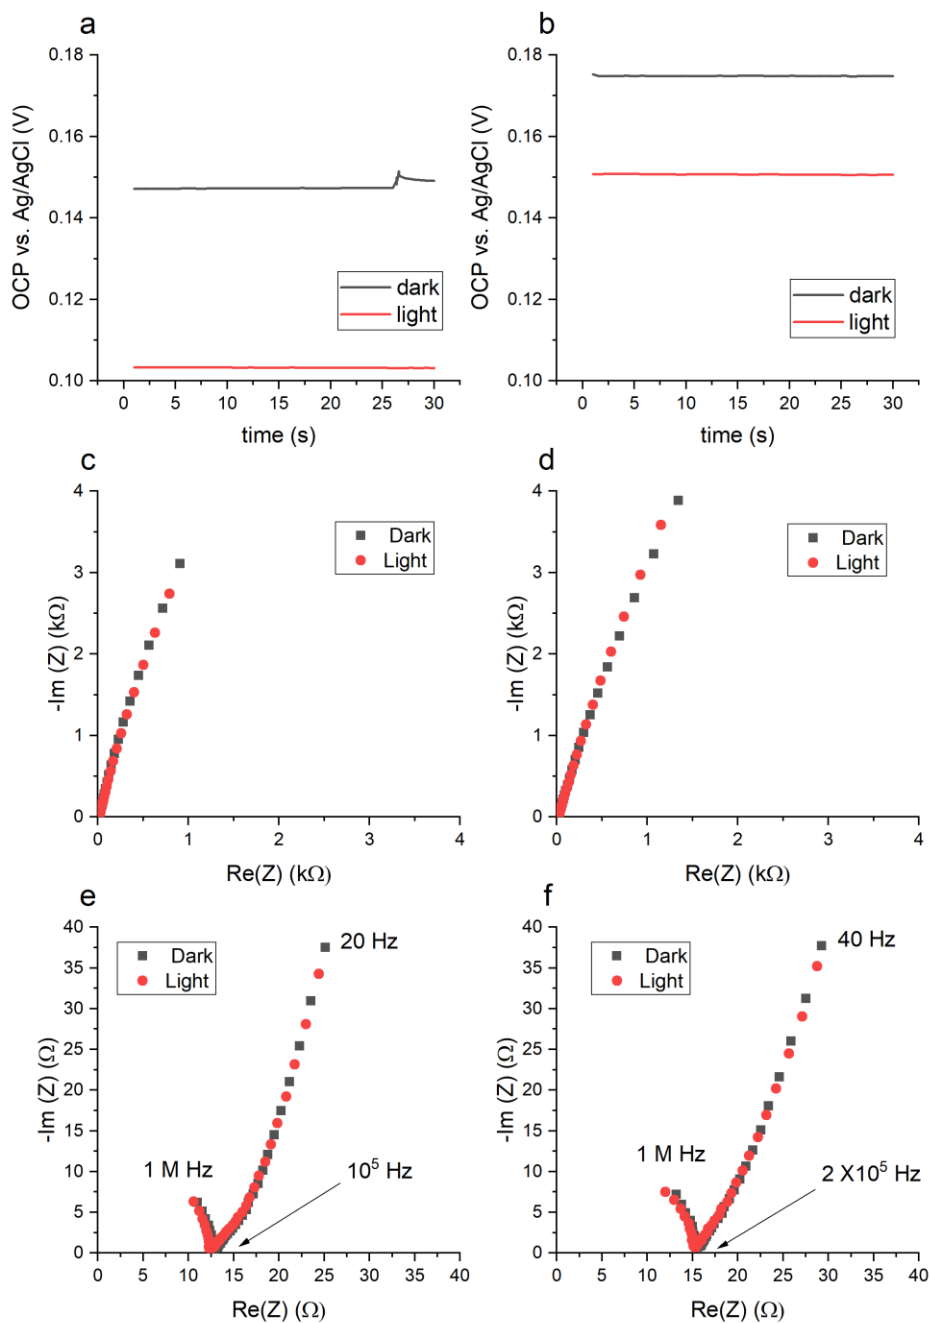

Figure S3. Open circuit potential measurements of (a) DHI-melanin and (b) DHI/DHICA-melanin. Nyquist plots at frequency range  $10^6$  Hz- $10^{-1}$  Hz of (c) DHI-melanin and (d) DHI/DHICA-melanin. (e) and (f) are zoomed high-frequency-range Nyquist plots for DHI-melanin and DHI/DHICA-melanin, respectively. Acquisition protocol: Open circuit potential vs. time (dark)  $\rightarrow$  EIS (dark)  $\rightarrow$  40 min irradiation (without bias)  $\rightarrow$  open circuit potential vs. time (light)  $\rightarrow$  EIS (light).

## Bare carbon paper

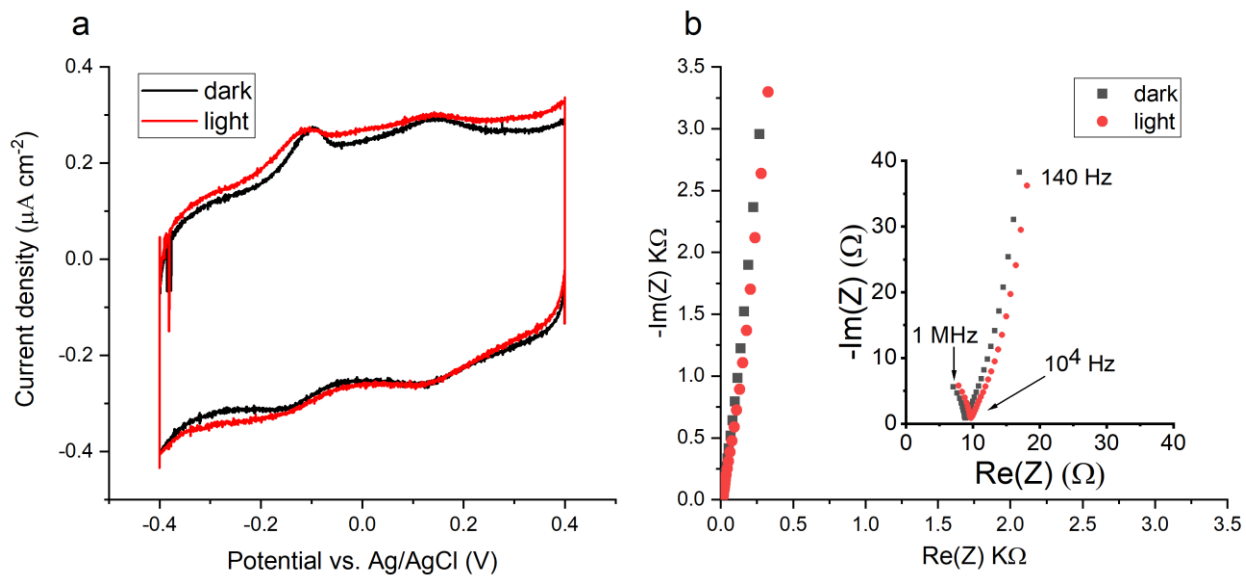

Figure S4. (a) Cyclic voltammetry at 5 mV/s and (b) Nyquist plot of bare carbon paper (inset: high frequency), 0.25 M  $\text{NaCH}_3\text{COO}$  (pH 5).

## Galvanostatic charge-discharge measurements

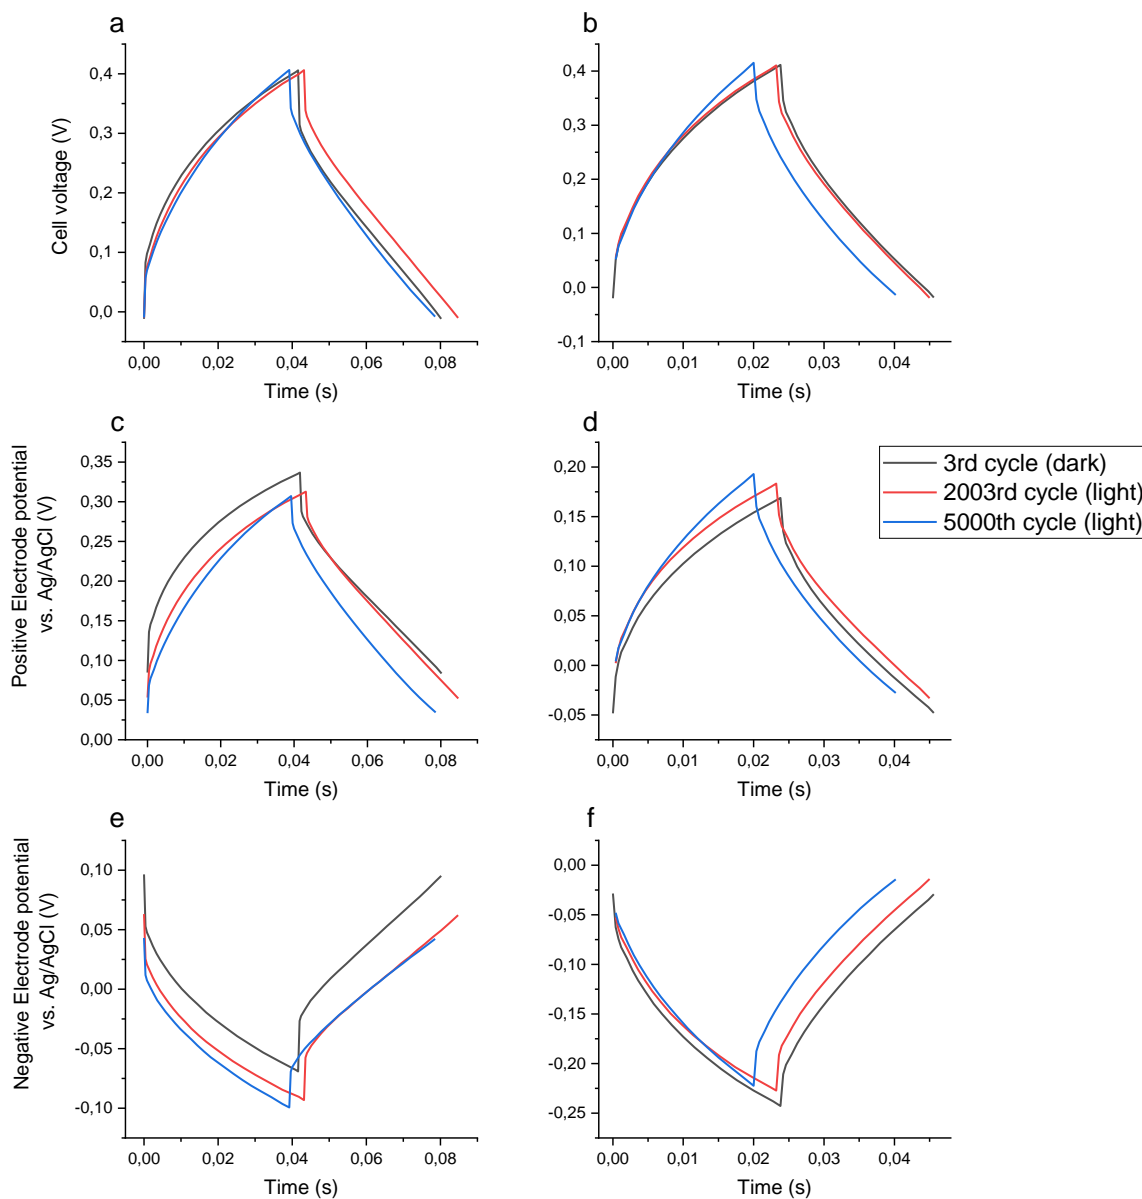

Figure S5. Galvanostatic curves of DHI-melanin (a, c, e) and DHI/DHICA-melanin (b, d, f). Black: 3<sup>rd</sup> cycle (under dark). Red: 2003<sup>rd</sup> cycle (under light, after 40 min irradiation). Blue: 5000<sup>th</sup> cycle (last cycle, under light conditions). Protocol of acquisition: dark → light → 40 min irradiation (without bias) light → dark → light, each for 1000 cycles.

Figure S5 shows 3 cycles of galvanostatic curves. Under light conditions, the potentials of both positively and negatively biased DHI-melanin electrodes shift towards negative values, by ca 9% (from 0.34 in the 3<sup>rd</sup> cycle to 0.31 V in both 2003<sup>rd</sup> cycle and 5000<sup>th</sup> cycle), whereas for DHI/DHICA-melanin shift towards positive values, by 6% (from 0.17 in the 3<sup>rd</sup> cycle to 0.18 V in 2003<sup>rd</sup> cycle) and 12% (from 0.17 in the 3<sup>rd</sup> cycle to 0.19 V in the 5000<sup>th</sup> cycle).

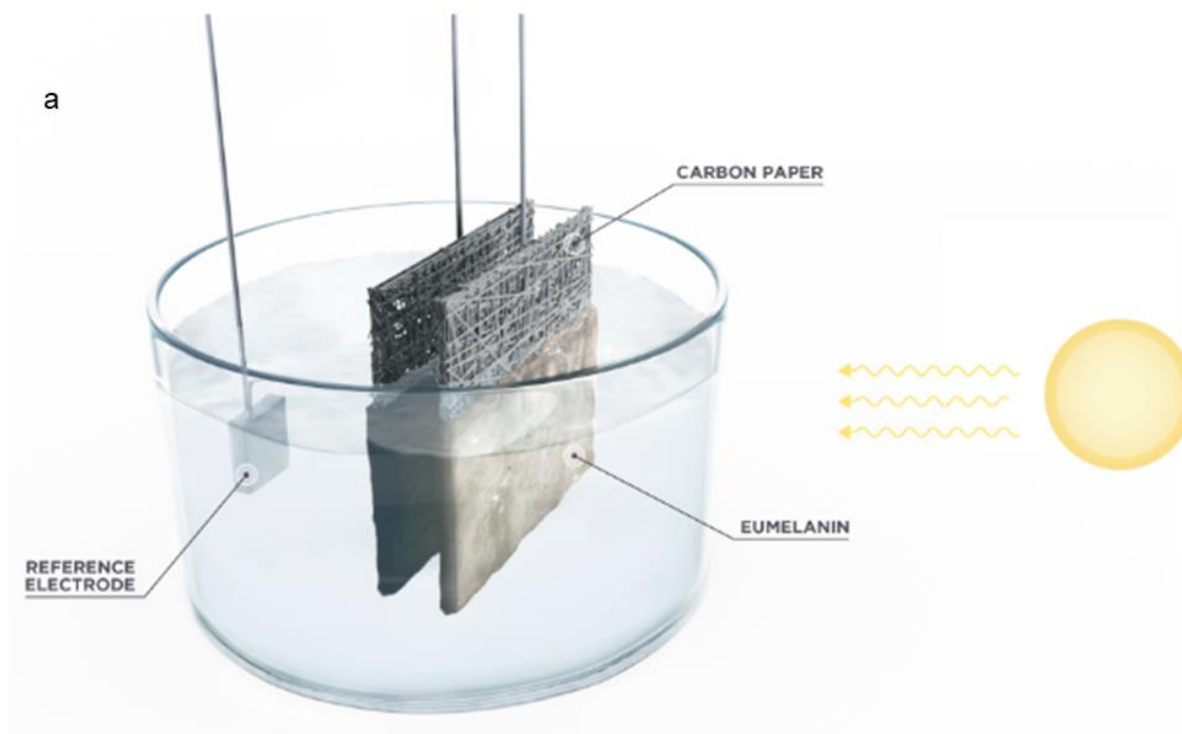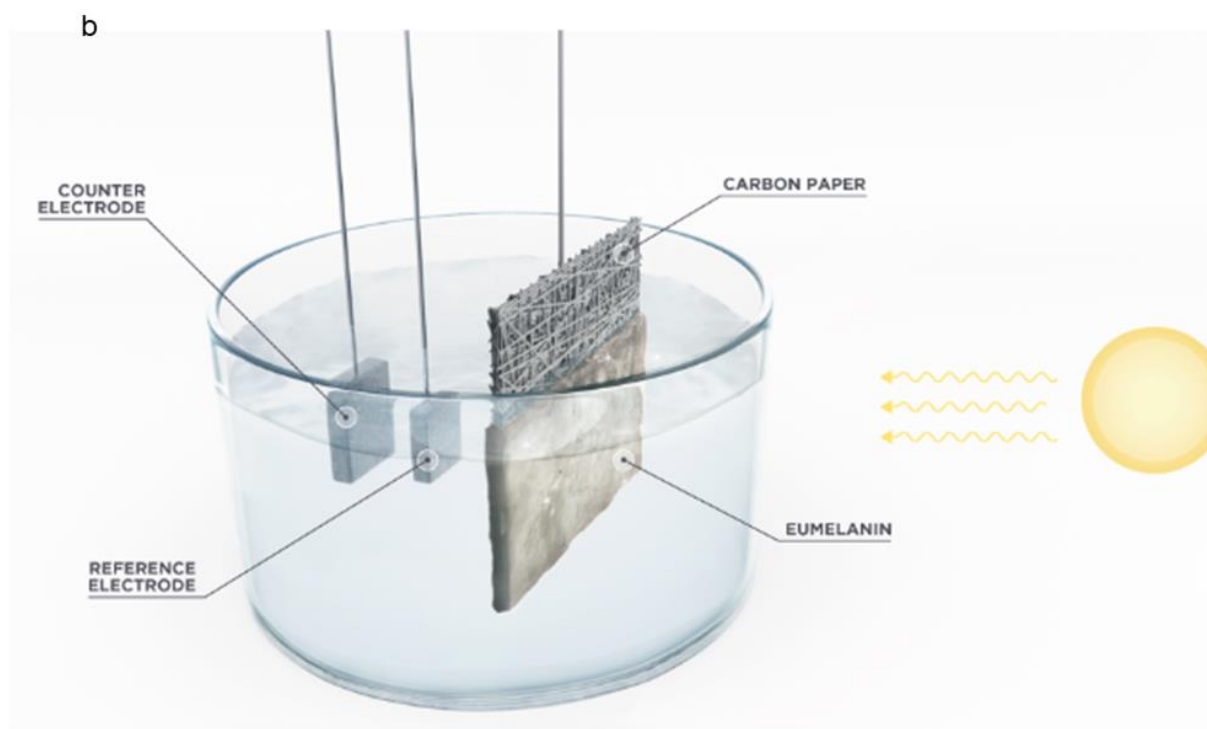

Scheme S1. Electrochemical configurations used to study our melanin samples on carbon paper: (a) supercapacitor (including a reference electrode) and (b) single electrode.



Table S1. Performance of integrated solar cells and energy storage devices in the literature (see explanations of abbreviations and acronyms below).

| Device structure         | Electrode materials                                                                                                                                                            | Electrolyte                                                                                                                              | Energy storage performance                                                                                                  | Efficiency (%)                                     | Ref |
|--------------------------|--------------------------------------------------------------------------------------------------------------------------------------------------------------------------------|------------------------------------------------------------------------------------------------------------------------------------------|-----------------------------------------------------------------------------------------------------------------------------|----------------------------------------------------|-----|
| PSB*                     | $M_{\text{an-ph}}$ WO <sub>3</sub> /TiO <sub>2</sub> /N719*<br>$M_{\text{ce-ph}}$ Pt                                                                                           | EL <sub>ph</sub> * LiI/I <sub>2</sub> /PC*/tBP*                                                                                          | $Q_{\text{ch}}^*$ 1.8 C cm <sup>-2</sup>                                                                                    | $\eta_{\text{tot}}$ 0.6                            | 1   |
| DSSC*/SC*                | $M_{\text{an-ph}}$ TiO <sub>2</sub> /N719<br>$M_{\text{ce-ph}}$ Pt<br>$M_{\text{ES}^+}$ , $M_{\text{ES}^-}$ -<br>PEDOT                                                         | EL <sub>ph</sub> LiI/I <sub>2</sub> /tert-butyl alcohol/tBP<br>EL <sub>ES</sub> * LiClO <sub>4</sub> /MPN*                               | $C_s^*$ 0.52 F cm <sup>-2</sup>                                                                                             | $\eta_{\text{con}}$ 4.4                            | 2   |
| DSSC/SC                  | $M_{\text{an-ph}}$ TiO <sub>2</sub> /N3<br>$M_{\text{ce-ph}}$ Pt<br>$M_{\text{ES}^+}$ , $M_{\text{ES}^-}$ -<br>PProDOT-Et <sub>2</sub> *                                       | EL <sub>ph</sub> LiI/I <sub>2</sub> /CH <sub>3</sub> CN<br>EL <sub>ES</sub> LiClO <sub>4</sub> /MPN                                      | $C_s$ 0.48 F cm <sup>-2</sup><br>$E_{\text{max}}^*$ 22 Wh cm <sup>-2</sup><br>$P_{\text{max}}^*$<br>0.6 mW cm <sup>-2</sup> | $\eta_{\text{stor}}$ 0.6                           | 3   |
| DSSC/SC<br>(1D)          | $M_{\text{an-ph}}$ ZnO<br>NW/N719<br>$M_{\text{ce-ph}}$ ZnO<br>NW/graphene<br>$M_{\text{ES}^+}$ , $M_{\text{ES}^-}$ - ZnO<br>NW                                                | EL <sub>ph</sub> LiI/I <sub>2</sub> /tBP/MPN<br>EL <sub>ES</sub> PVA/H <sub>3</sub> PO <sub>4</sub> gel                                  | $C_s$ 0.4 mF cm <sup>-2</sup>                                                                                               | $\eta_{\text{con}}$ 0.02                           | 4   |
| OPV*/SC                  | $M_{\text{an-ph}}$ P3HT/PCBM*<br>$M_{\text{ce-ph}}$ Al<br>$M_{\text{ES}^+}$ , $M_{\text{ES}^-}$ - CNT                                                                          | EL <sub>ph</sub> PEDOT/PSS<br>EL <sub>ES</sub> PVA/H <sub>3</sub> PO <sub>4</sub> gel                                                    | $C_s$ 28 F g <sup>-1</sup>                                                                                                  | $\eta_{\text{con}}$ 3.4                            | 5   |
| DSSC/SC<br>(1D)          | $M_{\text{an-ph}}$ Ti/TiO <sub>2</sub> /N719<br>$M_{\text{ce-ph}}$ CNT<br>$M_{\text{ES}^-}$ Ti/TiO <sub>2</sub><br>$M_{\text{ES}^+}$ CNT                                       | EL <sub>ph</sub> LiI/I <sub>2</sub> /DMPII*/tBP/<br>CH <sub>3</sub> CN<br>EL <sub>ES</sub> PVA/H <sub>3</sub> PO <sub>4</sub> gel        | $C_s$ 0.6 mF cm <sup>-2</sup>                                                                                               | $\eta_{\text{stor}}$ 68<br>$\eta_{\text{tot}}$ 1.5 | 6   |
| Tandem solar<br>cell/LIB | $M_{\text{an-ph}}$ TiO <sub>2</sub><br>NT/N719<br>$M_{\text{ce-ph}}$ Pt<br>$M_{\text{ES}^-}$ Ti/TiO <sub>2</sub><br>NT/N749<br>$M_{\text{ES}^+}$<br>LiCoO <sub>2</sub> /carbon | EL <sub>ph</sub> LiI/I <sub>2</sub> /tBP/CH <sub>3</sub> CN<br>EL <sub>ES</sub> LiPF <sub>6</sub> /ethylene carbonate/dimethyl carbonate | $Q_{\text{dis}}^*$ 39 $\mu$ Ah                                                                                              | $\eta_{\text{tot}}$ 0.82                           | 7   |
| DSSC/SC                  | $M_{\text{an-ph}}$ TiO <sub>2</sub> /N719<br>$M_{\text{ce-ph}}$ ZnO<br>NW/PVDF<br>$M_{\text{SC}^+}$ Pt/Au<br>$M_{\text{SC}^-}$ ZnO<br>NW/PVDF                                  | EL <sub>ph</sub> LiI/LiI <sub>3</sub> /GNCS*<br>/DMII*/tBP/MPN/<br>CH <sub>3</sub> CN                                                    | $Q_{\text{dis}}$ 2.1 C g <sup>-1</sup>                                                                                      | $\eta_{\text{con}}$ 3.7                            | 8   |

|                              |                                                                                                                                                              |                                                                                                                                                                            |                                                                                                                            |                                                                      |    |
|------------------------------|--------------------------------------------------------------------------------------------------------------------------------------------------------------|----------------------------------------------------------------------------------------------------------------------------------------------------------------------------|----------------------------------------------------------------------------------------------------------------------------|----------------------------------------------------------------------|----|
| DSSC/RFB*                    | M <sub>an-ph</sub> m-TiO <sub>2</sub> /Z907*<br>M <sub>ce-ph</sub> Pt<br>M <sub>ES+</sub> , M <sub>ES-</sub> Pt                                              | EL <sub>ca</sub> LiI/I <sub>2</sub> /LiClO <sub>4</sub> /PC<br>EL <sub>an</sub> DMFc*/LiClO <sub>4</sub> /MPN<br><b>for both DSSC and RFB</b>                              | Q <sub>dis</sub> 53 mAh l <sup>-1</sup>                                                                                    | η <sub>con</sub> 0.15                                                | 9  |
| DSSC/SC<br>(1D)              | M <sub>an-ph</sub> TiO <sub>2</sub> /N719<br>M <sub>ce-ph</sub> PaNi<br>M <sub>ES+</sub> , M <sub>ES-</sub> PaNi                                             | EL <sub>ph</sub><br>Bmiml*/I <sub>2</sub> /tBP/LiClO <sub>4</sub> /GIT<br>C*/CH <sub>3</sub> CN<br>EL <sub>ES</sub> H <sub>2</sub> SO <sub>4</sub>                         | C <sub>s</sub> 41 mF cm <sup>-2</sup>                                                                                      | η <sub>tot</sub> 2.1<br>η <sub>con</sub> 5.4                         | 10 |
| DSSC/SC                      | M <sub>an-ph</sub> TiO <sub>2</sub> /N719<br>M <sub>ce-ph</sub> CNT/PaNi<br>M <sub>ES+</sub> , M <sub>ES-</sub><br>CNT/PaNi                                  | EL <sub>ph</sub><br>LiI/I <sub>2</sub> /tBP/DMPII/PVDF-co-<br>HFP*/MPN<br>EL <sub>ES</sub> PVA/H <sub>3</sub> PO <sub>4</sub> gel                                          | C <sub>s</sub> 208 F g <sup>-1</sup>                                                                                       | η <sub>tot</sub> 5.1<br>η <sub>con</sub> 6.1                         | 11 |
| DSSC/SC                      | M <sub>an-ph</sub> TiO <sub>2</sub> /N749<br>M <sub>ce-ph</sub> Pt<br>M <sub>ES+</sub> , M <sub>ES-</sub><br>hydrogenated<br>TiO <sub>2</sub>                | EL <sub>ph</sub> LiI/I <sub>2</sub> /tBP/DMPII/<br>MPN<br>EL <sub>ES</sub> Li <sub>2</sub> SO <sub>4</sub>                                                                 | C <sub>s</sub> 1.1 mF cm <sup>-2</sup><br>C%* 99%<br>@3000 cycles                                                          | η <sub>tot</sub> 1.6<br>η <sub>con</sub> 3.2                         | 12 |
| DSSC/SC<br>(1D)              | M <sub>an-ph</sub> TiO <sub>2</sub> /N719<br>M <sub>ce-ph</sub> CNT<br>M <sub>ES+</sub> , M <sub>ES-</sub> CNT                                               | EL <sub>ph</sub><br>LiI/I <sub>2</sub> /tBP/DMPII/tBP/CH <sub>3</sub> C<br>N<br>EL <sub>ES</sub> PVA/H <sub>3</sub> PO <sub>4</sub> gel                                    | C <sub>s</sub> 21.7 F g <sup>-1</sup>                                                                                      | η <sub>tot</sub> 1.8<br>η <sub>con</sub> 6.5                         | 13 |
| Perovskite<br>solar cell/LIB | M <sub>an-ph</sub> PC61BM*<br>M <sub>ca-cc</sub> LiFePO <sub>4</sub><br>M <sub>an-cc</sub> Li <sub>4</sub> Ti <sub>5</sub> O <sub>12</sub>                   | EL <sub>ph</sub><br>CHNH <sub>3</sub> PbI <sub>3</sub> /PEDOT/<br>PSS<br>EL <sub>ES</sub> LiFP <sub>6</sub> /ethylene<br>carbonate/dimethyl<br>carbonate/diethyl carbonate | Q <sub>dis</sub> 142 mAh g <sup>-1</sup>                                                                                   | η <sub>tot</sub> 7.8<br>η <sub>con</sub> 15.7                        | 14 |
| Perovskite<br>Solar Cell/SC  | M <sub>an-ph</sub> TiO <sub>2</sub><br>M <sub>ce-ph</sub><br>MoO <sub>3</sub> /Au/MoO <sub>3</sub><br>M <sub>ES+</sub> , M <sub>ES-</sub> WO <sub>3</sub>    | EL <sub>ph</sub><br>CHNH <sub>3</sub> PbI <sub>3-x</sub> Cl <sub>x</sub> /spiro-<br>MeOTAD*<br>EL <sub>ES</sub> PVA/H <sub>2</sub> SO <sub>4</sub> gel                     | C <sub>s</sub> 431 F m <sup>-2</sup><br>E <sub>max</sub> 25 mWh m <sup>-2</sup><br>P <sub>max</sub> 377 mW m <sup>-2</sup> | η <sub>con</sub> 11.9                                                | 15 |
| Perovskite<br>Solar Cell/SC  | M <sub>an-ph</sub> c-TiO <sub>2</sub> /nano<br>TiO <sub>2</sub><br>M <sub>ce-ph</sub><br>PEDOT/carbon<br>M <sub>ES+</sub> , M <sub>ES-</sub><br>PEDOT/carbon | EL <sub>ph</sub> CH <sub>3</sub> NH <sub>3</sub> PbI <sub>3</sub><br>EL <sub>ES</sub> LiClO <sub>4</sub> /TMAI*/IPA*                                                       | C <sub>s</sub> 12 mF cm <sup>-2</sup><br>C% 95% @2000 cycles                                                               | η <sub>tot</sub> 4.7<br>η <sub>con</sub> 6.4<br>η <sub>stor</sub> 74 | 16 |
| SiNW solar<br>cell/SC        | M <sub>an-ph</sub><br>PEDOT/PSS<br>/SiNW/n-doped Si<br>M <sub>ce-ph</sub> Ag<br>M <sub>ES+</sub> , M <sub>ES-</sub><br>polypyrrole                           | EL <sub>ph</sub> PEDOT/PSS<br>EL <sub>ES</sub> PVA/H <sub>3</sub> PO <sub>4</sub> gel                                                                                      | C <sub>s</sub> 252 mF cm <sup>-2</sup><br><br>E <sub>max</sub><br>8.8 μWh cm <sup>-2</sup>                                 | η <sub>tot</sub> 10.5                                                | 17 |
| Commercial<br>solar cell/SC  | M <sub>SC</sub> Activated<br>carbon/PVDF                                                                                                                     | EL <sub>ES</sub> Na <sub>2</sub> SO <sub>4</sub>                                                                                                                           | C <sub>s</sub> 170 Fg <sup>-1</sup><br>C% 85%<br>@15000 cycles                                                             | —                                                                    | 18 |

|                           |                                                                                                                                                |                                                                                                                                       |                                                                                                                                                     |                                                     |           |
|---------------------------|------------------------------------------------------------------------------------------------------------------------------------------------|---------------------------------------------------------------------------------------------------------------------------------------|-----------------------------------------------------------------------------------------------------------------------------------------------------|-----------------------------------------------------|-----------|
|                           |                                                                                                                                                |                                                                                                                                       | $E_{\max}$ 17.7 Wh kg <sup>-1</sup><br>$P_{\max}$ 450 W kg <sup>-1</sup>                                                                            |                                                     |           |
| SiNW* solar cell/SC       | $M_{\text{an-ph}}$ PEDOT:PSS /SiNW/n-doped Si<br>$M_{\text{ce-ph}}$ Ag<br>$M_{\text{ES}^+}$ , $M_{\text{ES}^-}$ graphene                       | $EL_{\text{ES}}$ H <sub>2</sub> SO <sub>4</sub>                                                                                       | $C_s$ 16 mF cm <sup>-2</sup><br>C% 90%<br>@10000 cycles                                                                                             | $\eta_{\text{con}}$ 12.4<br>$\eta_{\text{tot}}$ 2.9 | 19        |
| Perovskite solar cell /SC | $M_{\text{an-ph}}$ c-TiO <sub>2</sub> /m-TiO <sub>2</sub><br>$M_{\text{ce-ph}}$ nanocarbon<br>$M_{\text{ES}^+}$ , $M_{\text{ES}^-}$ nanocarbon | $EL_{\text{ph}}$ CsPbBr <sub>3</sub><br>$EL_{\text{ES}}$ SiO <sub>2</sub> gel                                                         | $C_s$ 38 mF cm <sup>-2</sup><br>$E_{\max}$ 10 μWh cm <sup>-2</sup><br>$P_{\max}$ 480 μW cm <sup>-2</sup>                                            | $\eta_{\text{con}}$ 5.1                             | 20        |
| Perovskite solar cell/SC  | $M_{\text{an-ph}}$ c-TiO <sub>2</sub> /m-TiO <sub>2</sub><br>$M_{\text{ce-ph}}$ nanocarbon<br>$M_{\text{ES}^+}$ , $M_{\text{ES}^-}$ nanocarbon | $EL_{\text{ph}}$ CH <sub>3</sub> NH <sub>3</sub> PbI <sub>3</sub><br>$EL_{\text{ES}}$ PVA/H <sub>3</sub> PO <sub>4</sub> gel          | $C_s$ 12.5 mF cm <sup>-2</sup> C% 85%<br>@3000 cycle                                                                                                | $\eta_{\text{con}}$ 7.1                             | 21        |
| Perovskite solar cell/SC  | $M_{\text{ES}^+}$ , $M_{\text{ES}^-}$ carbon/PTFE                                                                                              | $EL_{\text{ph}}$ CsPbI <sub>3-x</sub> Br <sub>x</sub> Spiro-MeOTAD/LiTFSI/FK209/tBP<br>$EL_{\text{ES}}$ PYR <sub>14</sub> TFSI/TEGDME | $C_s$ 390 mF cm <sup>-2</sup><br>$Q$ 360 mC cm <sup>-2</sup><br>$E_{\max}$ 0.5 mWh cm <sup>-2</sup><br>$P_{\max}$ 68.4 mW cm <sup>-2</sup>          | —                                                   | 22        |
| Light-assisted SC         | $M_{\text{SC}}$ WO <sub>3</sub>                                                                                                                | H <sub>2</sub> SO <sub>4</sub> pH 0                                                                                                   | $C_s$ 7.5 mF cm <sup>-2</sup>                                                                                                                       | —                                                   | 23        |
| Light-assisted SC         | $M_{\text{SC}}$ eumelanin                                                                                                                      | NaCH <sub>3</sub> COO (aq) pH 5.5                                                                                                     | $C_s$ 5.3 mF cm <sup>-2</sup> $E_{\max}$ 52 mJ g <sup>-1</sup> $P_{\max}$ 5.9 Wg <sup>-1</sup><br>C% 96%<br>@3000 cycles<br>Q%*103%<br>@3000 cycles | $\eta_{\text{tot}}$ 0.6 (see note below)            | This work |

#### Device structure

PSB: Photovoltaically Self-charging Battery

DSSC: Dye Sensitized Solar Cell

SC: Supercapacitor

OPV: Organic Photovoltaic cell

P3HT/PCBM: poly(3-hexylthiophene)/phenyl-C61-butyric acid methyl ester

LIB: Lithium Ion Battery

RFB: Redox Flow Battery

SiNW: Silicon NanoWire

#### Materials

$M_{\text{an-ph}}$ : Material for photoanode

$M_{\text{ce-ph}}$ : Material for counter electrode of solar cell

$M_{\text{ES}^+}$ : Material for the positive electrode of energy storage unit

$M_{\text{ES}^-}$ : Material for the negative electrode of energy storage unit

N719: Di-tetrabutylammonium *cis*-bis(isothiocyanato)bis(2,2'-bipyridyl-4,4'-dicarboxylato) ruthenium(II) (dye)

N749: cis-bis(isothiocyanato)bis(2,2-bipyridyl-4,4-dicarboxylato)-ruthenium(II)-bis-tetrabutylammonium (dye)  
 N3: Cis-bis(isothiocyanato)bis(2,2'-bipyridyl-4,4'-dicarboxylato) ruthenium(II) (dye)  
 CNT: Carbon NanoTube  
 PC61BM: [6,6]-phenyl-C61-butyrac acid methyl ester  
 PProDOT-Et<sub>2</sub>: poly(3,3-diethyl-3,4-dihydro-2Hthieno-[3,4-b][1,4]dioxepine)  
 PANi: polyaniline  
 PEDOT: poly(3,4-ethylenedioxythiophene)  
 PSS: poly(styrenesulfonate)  
 PVDF: polyvinylidene fluoride  
 Z907: Ru(2,2'-bipyridyl-4,4'-dicarboxylic acid)(4,4'-dinonyl-2,2'-bipyridine)(NCS)<sub>2</sub>  
 c-TiO<sub>2</sub>: compact-TiO<sub>2</sub>  
 m-TiO<sub>2</sub>: mesoporous-TiO<sub>2</sub>  
 PTFE: polytetrafluoroethylene  
Electrolytes  
 EL<sub>ph</sub>: solar cell electrolyte  
 EL<sub>ES</sub>: energy storage electrolyte  
 EL<sub>ca</sub>: electrolyte for cathode  
 EL<sub>an</sub>: electrolyte for anode  
 PC: propylene carbonate  
 tBP: 4-tertbutylpyridine  
 MPN: 3-methoxypropionitrile  
 PVA: poly(vinyl alcohol)  
 DMPII: dimethyl-3-n-propylimidazolium iodide  
 GNCS: guanidinium thiocyanate  
 DMII: 1,3-dimethylimidazolium iodide  
 DMFc: bis(pentamethylcyclopentadienyl)iron  
 BmimI: 1-butyl-3-methylimidazolium Iodide (ionic liquid)  
 PVDF-co-HFP: poly(vinylidene fluoride-co-hexa-fluoropropene)  
 Spiro-MeOTAD: 2,2',7,7'-tetrakis(N,N-di-p-methoxyphenylamine)-9,9-spirobifluorene  
 TMAI: tetramethylammonium iodide  
 IPA: isopropanol  
 PYR<sub>14</sub>TFSI: N-butyl-N-methyl pyrrolidinium bis(trifluoromethanesulfonyl)imide  
 TEGDME: tetraethylene glycol dimethyl ether  
 LiTFSI: bis(trifluoromethylsulfonyl)imide lithium salt  
 FK209: tris(2-(1H-pyrazol-1-yl)-4-tertbutylpyridine)-cobalt (III) tris(bis (trifluoromethylsulfonyl)imide)  
Energy storage performance  
 Q<sub>ch</sub>: charging capacity  
 Q<sub>dis</sub>: discharging capacity  
 C<sub>s</sub>: specific capacitance  
 E<sub>max</sub>: maximum energy density  
 P<sub>max</sub>: maximum power density  
 Q: capacity  
 C%: capacitance retention  
 Q%: capacity retention  
Efficiency  
 η<sub>tot</sub>: overall (energy conversion and storage) efficiency  
 η<sub>con</sub>: photon-to-electrical energy conversion efficiency  
 η<sub>stor</sub>: energy storage efficiency

In this work, the total energy conversion and storage efficiency has been calculated using the equation:

$$\eta = \frac{P_{out}}{P_{input}} = \frac{\text{Maximum power density calculated during discharge per unit area}}{\text{Incident solar power density}} = \frac{0.59 \text{ mW cm}^{-2}}{100 \text{ mW cm}^{-2}} =$$

0.6%

The maximum power density has been calculated using  $P_{max} = \frac{V_{Max}^2}{4 ESR A}$ , where  $V_{max}$  is the upper limit of the potential while discharging, ESR is the equivalent series resistance and A is the electrode active area.

Table S2. Capacity and capacitance of DHI- and DHI/DHICA-melanin on carbon paper, extracted from the cathodic currents in the cyclic voltammograms in Figure S1.

| Sample      | Condition | Cycle number | Capacity<br>(mC cm <sup>-2</sup> ) | Capacitance<br>(mF cm <sup>-2</sup> ) |
|-------------|-----------|--------------|------------------------------------|---------------------------------------|
| DHI-melanin | Dark      | 2            | 2.3                                | 3.2                                   |
|             |           | 4            | 2.2                                | 3.7                                   |
|             |           | 6            | 2.3                                | 3.8                                   |
|             | Light     | 8            | 2.6                                | 4.9                                   |
|             |           | 10           | 2.6                                | 4.8                                   |
|             |           | 12           | 2.7                                | 5.1                                   |
|             |           | 14           | 2.8                                | 5.2                                   |
|             |           | 16           | 2.8                                | 5.2                                   |
|             |           | 18           | 2.8                                | 5.2                                   |
|             |           | 20           | 2.7                                | 5.1                                   |
|             |           | 22           | 2.8                                | 5.3                                   |
|             |           | Dark         | 24                                 | 2.5                                   |
|             | 26        |              | 2.4                                | 4.5                                   |
|             | 28        |              | 2.3                                | 4.3                                   |
|             | 30        |              | 2.3                                | 4.2                                   |

|                       |       |      |     |     |
|-----------------------|-------|------|-----|-----|
|                       |       | 32   | 2.3 | 4.2 |
|                       |       | 34   | 2.3 | 4.3 |
|                       |       | 36   | 2.3 | 4.2 |
| DHI/DHICA-<br>melanin | Dark  | 2    | 1.7 | 2.7 |
|                       |       | 4    | 1.8 | 3.0 |
|                       |       | 6    | 1.8 | 3.1 |
|                       | Light | 8    | 2.0 | 3.4 |
|                       |       | 10   | 2.0 | 3.6 |
|                       |       | 12   | 2.1 | 3.8 |
|                       |       | 14   | 2.1 | 3.8 |
|                       |       | 16   | 2.1 | 3.9 |
|                       |       | 18   | 2.1 | 3.8 |
|                       |       | 20   | 2.1 | 3.9 |
|                       |       | 22   | 2.1 | 3.8 |
|                       |       | Dark | 24  | 1.8 |
|                       | 26    |      | 1.7 | 3.2 |
|                       | 28    |      | 1.8 | 3.2 |
|                       | 30    |      | 1.8 | 3.3 |
| 32                    | 1.8   |      | 3.3 |     |

|  |  |    |     |     |
|--|--|----|-----|-----|
|  |  | 34 | 1.8 | 3.2 |
|  |  | 36 | 1.7 | 3.2 |



Table S3. Average capacity and capacitance calculated for steps lasting for 1000 cycles each in galvanostatic results of melanin-supercapacitor on carbon paper (Figure 2 and 3). Protocol of acquisition: dark → light → 40 min irradiation (no bias) → light → dark → light, each for 1000 cycles.

| Sample            | Condition | Cycles where the average values are calculated | Capacity during charging ( $\mu\text{C cm}^{-2}$ ) | Capacity during discharging ( $\mu\text{C cm}^{-2}$ ) | Capacitance ( $\mu\text{F cm}^{-2}$ ) |
|-------------------|-----------|------------------------------------------------|----------------------------------------------------|-------------------------------------------------------|---------------------------------------|
| DHI-melanin       | Dark      | (0-1000)                                       | 35                                                 | 35                                                    | 121                                   |
|                   | Light     | (1001-2000)                                    | 32                                                 | 33                                                    | 115                                   |
|                   | Light     | (2001-3000)                                    | 40                                                 | 41                                                    | 127                                   |
|                   | Dark      | (3001-4000)                                    | 37                                                 | 38                                                    | 116                                   |
|                   | Light     | (4001-5000)                                    | 39                                                 | 39                                                    | 119                                   |
| DHI/DHICA-melanin | Dark      | (0-1000)                                       | 20                                                 | 20                                                    | 67                                    |
|                   | Light     | (1001-2000)                                    | 20                                                 | 20                                                    | 67                                    |
|                   | Light     | (2001-3000)                                    | 21                                                 | 21                                                    | 71                                    |
|                   | Dark      | (3001-4000)                                    | 20                                                 | 20                                                    | 68                                    |
|                   | Light     | (4001-5000)                                    | 20                                                 | 20                                                    | 67                                    |

Table S4. Capacity and capacitance change of eumelanin on carbon paper during galvanostatic measurements. The comparison is made for every 1000 cycles (Figures 2 and 3).

| Conditions | DHI-melanin     |                    | DHI/DHICA -melanin |                    |
|------------|-----------------|--------------------|--------------------|--------------------|
|            | Capacity change | Capacitance change | Capacity change    | Capacitance change |
| Dark       | -20%            | -12%               | -28%               | -12%               |
| Light      | -9%             | -13%               | -10%               | -6%                |
| Light      | -8%             | -3%                | -10%               | -2%                |
| Dark       | -2%             | -2%                | -3%                | -2%                |
| Light      | +5%             | +4%                | -3%                | +1%                |

Table S5. Fitting parameters of the equivalent circuit of both DHI- and DHI/DHICA-melanin in the frequency range 2 kHz -82 Hz (see also Figure 2 and Figure 3 in the main file).

| Fitting parameters             | DHI-melanin |       | DHI/DHICA-melanin |       |
|--------------------------------|-------------|-------|-------------------|-------|
|                                | Dark        | Light | Dark              | Light |
| $R_{tot} = R_u + R_{ct}$ (Ohm) | 22.0        | 18.6  | 20.3              | 17.9  |
| Q (mF.s <sup>n-1</sup> )       | 0.8         | 1.2   | 0.4               | 0.6   |
| n                              | 0.7         | 0.6   | 0.7               | 0.7   |

## References

1. Hauch, A.; Georg, A.; Krašovec, U. O.; Orel, B., Photovoltaically self-charging battery. *Journal of the Electrochemical Society* **2002**, *149* (9), A1208-A1211.
2. Chen, H. W.; Hsu, C. Y.; Chen, J. G.; Lee, K. M.; Wang, C. C.; Huang, K. C.; Ho, K. C., Plastic dye-sensitized photo-supercapacitor using electrophoretic deposition and compression methods. *Journal of Power Sources* **2010**, *195* (18), 6225-6231.
3. Hsu, C. Y.; Chen, H. W.; Lee, K. M.; Hu, C. W.; Ho, K. C., A dye-sensitized photo-supercapacitor based on PProDOT-Et<sub>2</sub> thick films. *Journal of Power Sources* **2010**, *195* (18), 6232-6238.
4. Bae, J.; Park, Y. J.; Lee, M.; Cha, S. N.; Choi, Y. J.; Lee, C. S.; Kim, J. M.; Wang, Z. L., Single - fiber - based hybridization of energy converters and storage units using graphene as electrodes. *Advanced materials* **2011**, *23* (30), 3446-3449.
5. Wee, G.; Salim, T.; Lam, Y. M.; Mhaisalkar, S. G.; Srinivasan, M., Printable photo-supercapacitor using single-walled carbon nanotubes. *Energy & Environmental Science* **2011**, *4* (2), 413-416.
6. Chen, T.; Qiu, L.; Yang, Z.; Cai, Z.; Ren, J.; Li, H.; Lin, H.; Sun, X.; Peng, H., An integrated “energy wire” for both photoelectric conversion and energy storage. *Angewandte Chemie International Edition* **2012**, *51* (48), 11977-11980.
7. Guo, W.; Xue, X.; Wang, S.; Lin, C.; Wang, Z. L., An integrated power pack of dye-sensitized solar cell and Li battery based on double-sided TiO<sub>2</sub> nanotube arrays. *Nano letters* **2012**, *12* (5), 2520-2523.

8. Zhang, X.; Huang, X.; Li, C.; Jiang, H., Dye - sensitized solar cell with energy storage function through PVDF/ZnO nanocomposite counter electrode. *Advanced Materials* **2013**, *25* (30), 4093-4096.
9. Liu, P.; Cao, Y. I.; Li, G. R.; Gao, X. P.; Ai, X. P.; Yang, H. X., A solar rechargeable flow battery based on photoregeneration of two soluble redox couples. *ChemSusChem* **2013**, *6* (5), 802-806.
10. Fu, Y.; Wu, H.; Ye, S.; Cai, X.; Yu, X.; Hou, S.; Kafafy, H.; Zou, D., Integrated power fiber for energy conversion and storage. *Energy & Environmental Science* **2013**, *6* (3), 805-812.
11. Yang, Z.; Li, L.; Luo, Y.; He, R.; Qiu, L.; Lin, H.; Peng, H., An integrated device for both photoelectric conversion and energy storage based on free-standing and aligned carbon nanotube film. *Journal of Materials Chemistry A* **2013**, *1* (3), 954-958.
12. Xu, J.; Wu, H.; Lu, L.; Leung, S. F.; Chen, D.; Chen, X.; Fan, Z.; Shen, G.; Li, D., Integrated Photo - supercapacitor Based on Bi - polar TiO<sub>2</sub> Nanotube Arrays with Selective One - Side Plasma - Assisted Hydrogenation. *Advanced Functional Materials* **2014**, *24* (13), 1840-1846.
13. Yang, Z.; Deng, J.; Sun, H.; Ren, J.; Pan, S.; Peng, H., Self - Powered Energy Fiber: Energy Conversion in the Sheath and Storage in the Core. *Advanced Materials* **2014**, *26* (41), 7038-7042.
14. Xu, J.; Chen, Y.; Dai, L., Efficiently photo-charging lithium-ion battery by perovskite solar cell. *Nature communications* **2015**, *6*, 8103.
15. Zhou, F.; Ren, Z.; Zhao, Y.; Shen, X.; Wang, A.; Li, Y. Y.; Surya, C.; Chai, Y., Perovskite photovoltachromic supercapacitor with all-transparent electrodes. *ACS nano* **2016**, *10* (6), 5900-5908.

16. Xu, J.; Ku, Z.; Zhang, Y.; Chao, D.; Fan, H. J., Integrated Photo - Supercapacitor Based on PEDOT Modified Printable Perovskite Solar Cell. *Advanced Materials Technologies* **2016**, *1* (5), 1600074.
17. Liu, R.; Wang, J.; Sun, T.; Wang, M.; Wu, C.; Zou, H.; Song, T.; Zhang, X.; Lee, S. T.; Wang, Z. L., Silicon nanowire/polymer hybrid solar cell-supercapacitor: a self-charging power unit with a total efficiency of 10.5%. *Nano letters* **2017**, *17* (7), 4240-4247.
18. Vijayakumar, M.; Adduru, J.; Rao, T. N.; Karthik, M., Conversion of Solar Energy into Electrical Energy Storage: Supercapacitor as an Ultrafast Energy - Storage Device Made from Biodegradable Agar - Agar as a Novel and Low - Cost Carbon Precursor. *Global Challenges* **2018**, 1800037.
19. Liu, H.; Li, M.; Kaner, R. B.; Chen, S.; Pei, Q., Monolithically Integrated Self-Charging Power Pack Consisting of a Silicon Nanowire Array/Conductive Polymer Hybrid Solar Cell and a Laser-Scribed Graphene Supercapacitor. *ACS applied materials & interfaces* **2018**, *10* (18), 15609-15615.
20. Liang, J.; Zhu, G.; Wang, C.; Zhao, P.; Wang, Y.; Hu, Y.; Ma, L.; Tie, Z.; Liu, J.; Jin, Z., An all-inorganic perovskite solar capacitor for efficient and stable spontaneous photocharging. *Nano Energy* **2018**, *52*, 239-245.
21. Liang, J.; Zhu, G.; Lu, Z.; Zhao, P.; Wang, C.; Ma, Y.; Xu, Z.; Wang, Y.; Hu, Y.; Ma, L., Integrated perovskite solar capacitors with high energy conversion efficiency and fast photo-charging rate. *Journal of Materials Chemistry A* **2018**, *6* (5), 2047-2052.
22. Intermite, S.; Arbizzani, C.; Soavi, F.; Gholipour, S.; Turren-Cruz, S.-H.; Correa-Baena, J. P.; Saliba, M.; Vlachopoulos, N.; Ali, A. M.; Hagfeldt, A., Perovskite solar cell–electrochemical double layer capacitor interplay. *Electrochimica Acta* **2017**, *258*, 825-833.

23. Zhu M., Huang Y., Huang Y., Pei Z., Xue Q., Li H., Geng H., Zhi C., Capacitance Enhancement in a Semiconductor Nanostructure-Based Supercapacitor by Solar Light and a Self-Powered Supercapacitor–Photodetector System. *Advanced Functional Materials* **2016**, *26*, 4481-4490.
